# Supplementary material for: A rapid screening platform for antibiotic susceptibility testing based on a simple colorimetric method
Source: Royal Society of Chemistry journal article supplement (doi:10.1039/d3an00611e), 2023-01-01
Supplement: d3an00611e1.pdf [file d3an00611e1.pdf]

## A rapid screening platform for antibiotic susceptibility testing based on simple colorimetry

Rui Zhao, Yubin Shen, Chenyu Zhao, Yuyang Liu, Chengfeng Wu, Huakun Wan, Zhentan Lu\*

Key Laboratory of Textile Fiber and Products Ministry of Education, School of Materials Science and Engineering, Hubei International Scientific and Technological Cooperation Base of Intelligent Textile Materials & Application, Wuhan Textile University, Wuhan, 430200, China

\*Zhentan Lu: luzhentan@wtu.edu.cn

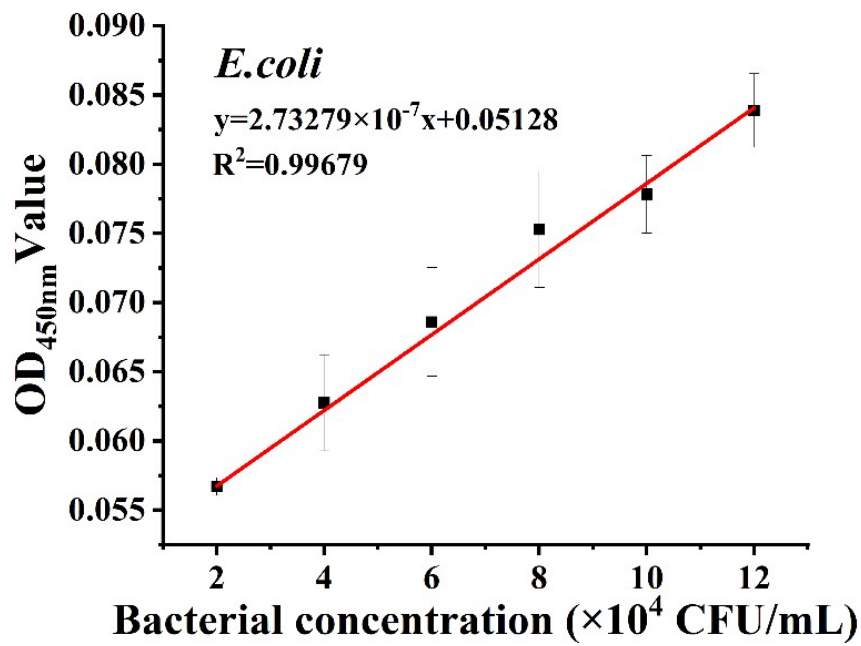

**Figure S1.** (a) The chromogenic mechanism between the bacteria and CCK 8 solution; (b) linear relationship between the OD450 and the *E. coli* concentration.

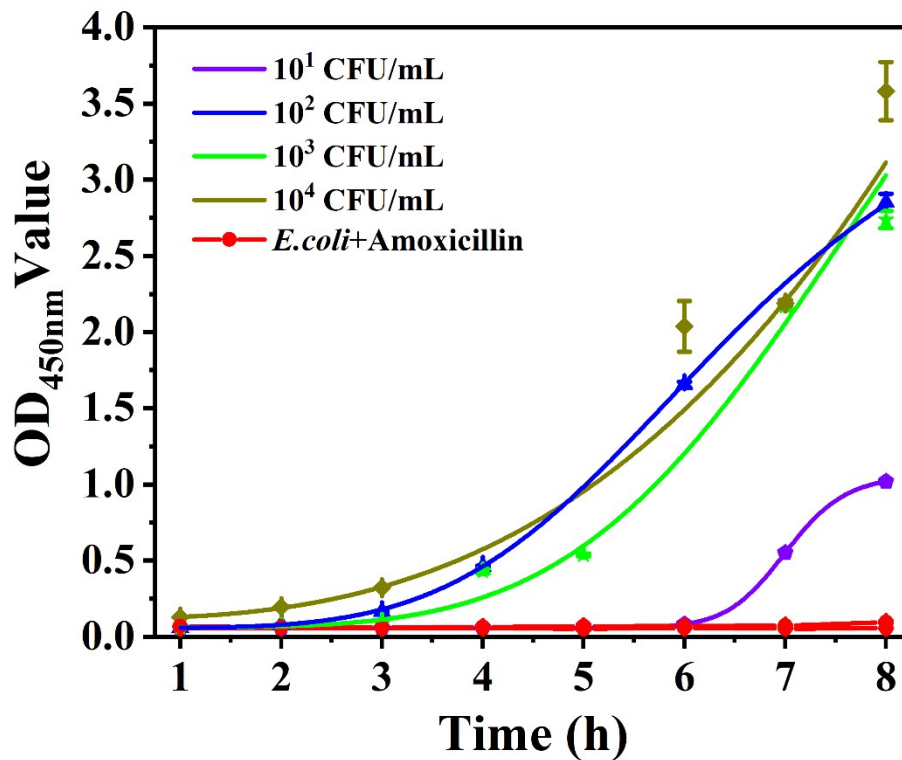

**Figure S2.** The absorbance at 450 nm of CCK8 formazan when the bacteria was co-cultured with or without amoxicillin at different time.

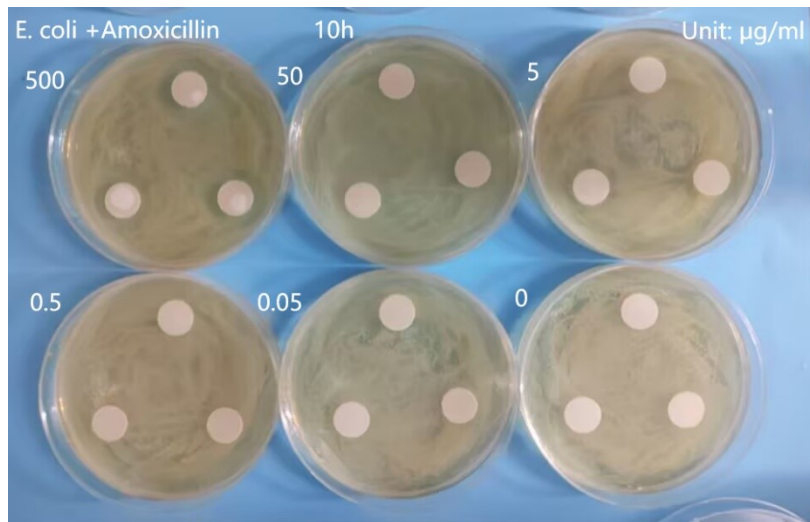

**Figure S3.** The growth inhibition of amoxicillin against *E. coli* at 10 h with plating method.

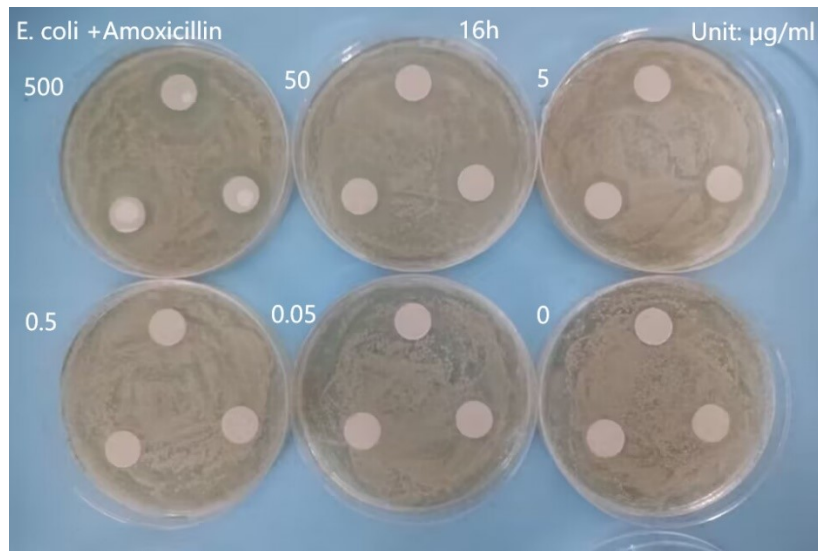

**Figure S4.** The growth inhibition of amoxicillin against *E. coli* at 16 h using plating method.

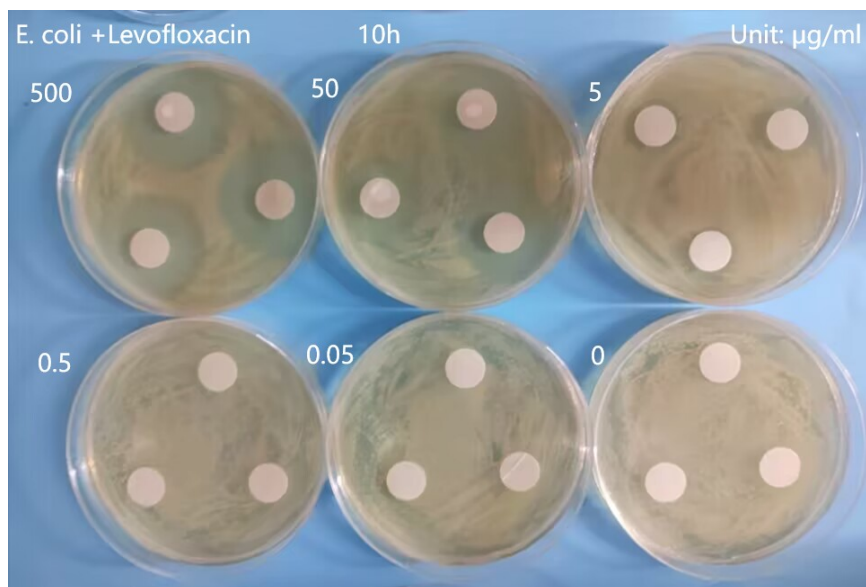

**Figure S5.** The growth inhibition of levofloxacin against *E. coli* at 10 h using plating method.

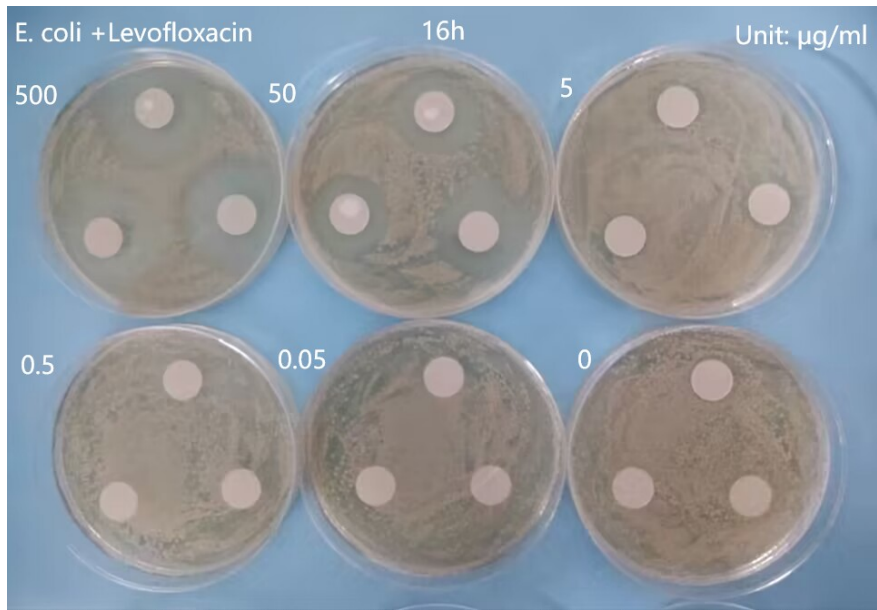

**Figure S6.** The growth inhibition of levofloxacin against *E. coli* at 16 h using plating method.

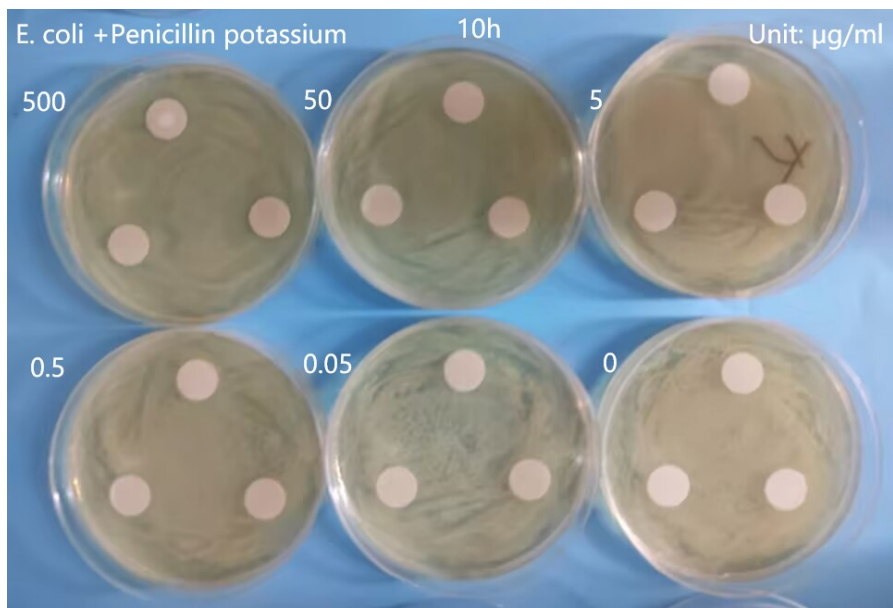

**Figure S7.** The growth inhibition of penicillin potassium against *E. coli* at 10 h using plating method.

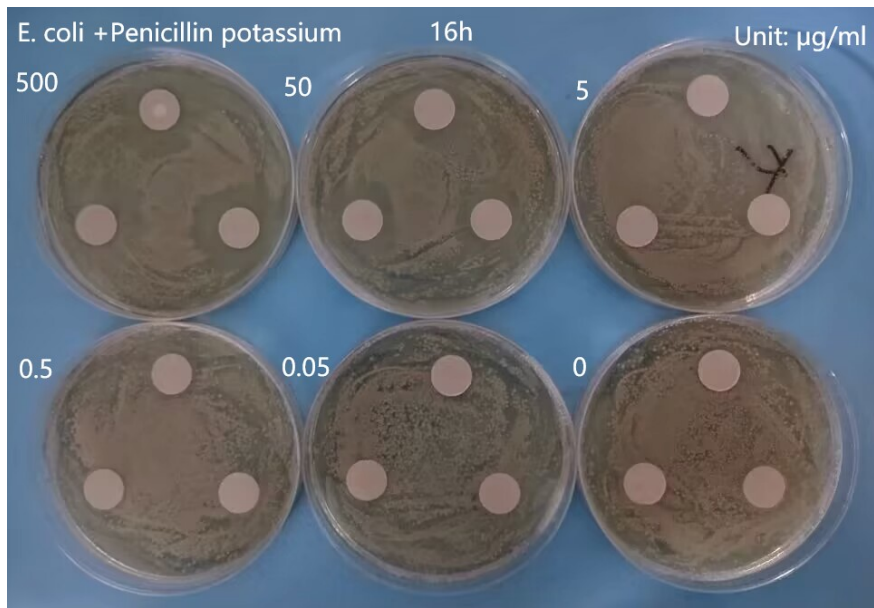

**Figure S8.** The growth inhibition of penicillin potassium against *E. coli* at 16 h using plating method.

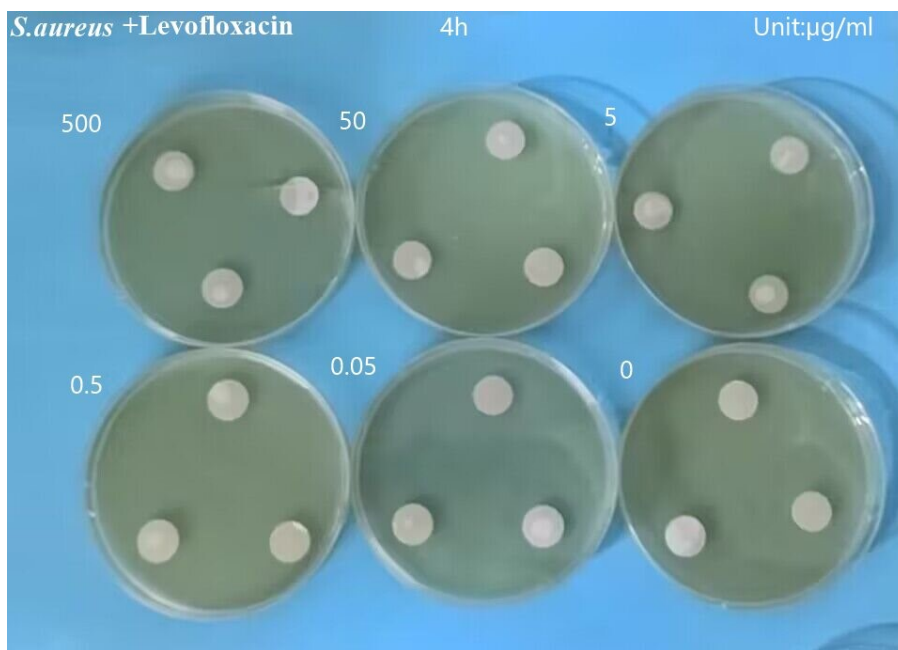

**Figure S9.** The growth inhibition of Levofloxacin against *S. aureus* at 4 h using plating method.

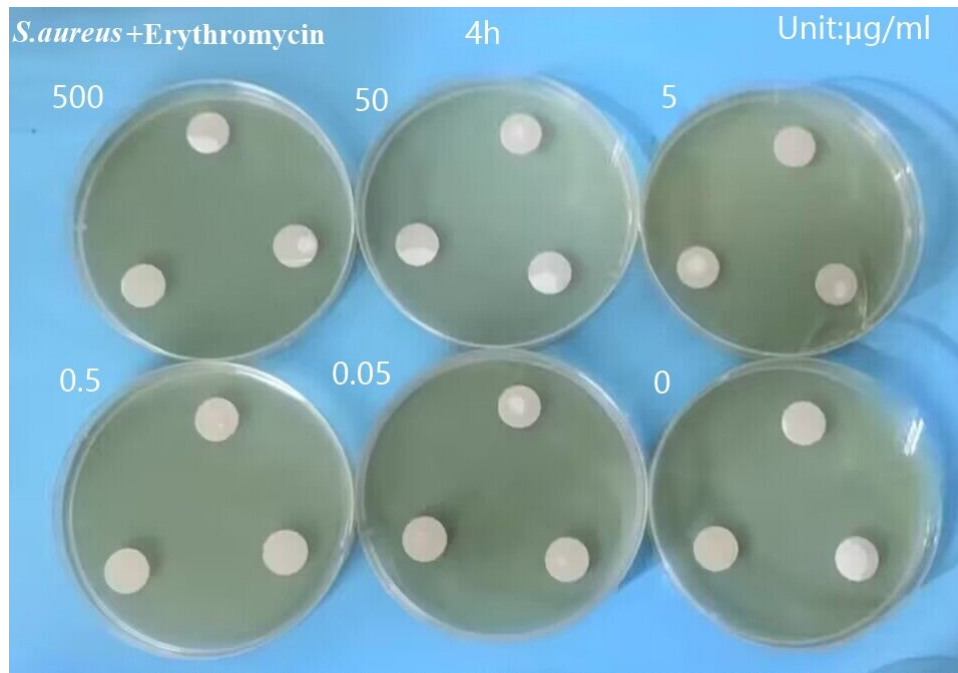

**Figure S10.** The growth inhibition of erythromycin against *S. aureus* at 4 h using plating method.

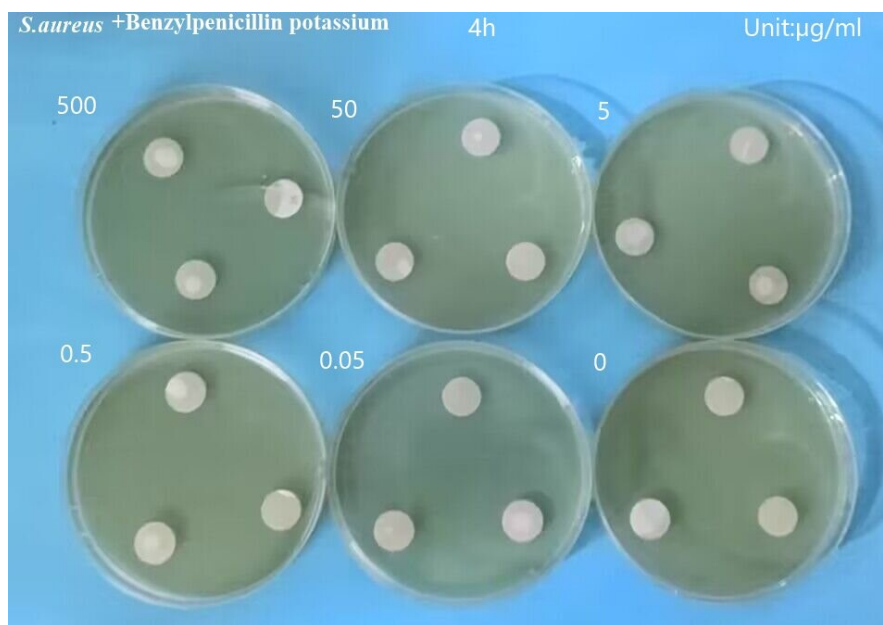

**Figure S11.** The growth inhibition of benzylpenicillin potassium against *S. aureus* at 4 h using plating method.
